# Supplementary material for: Thin copper oxide nanowires/carbon nanotubes interpenetrating networks for lithium ion batteries
Source: Royal Society of Chemistry journal article supplement (doi:10.1039/c2ce25873k), 2012-01-01
Supplement: c2ce25873k.pdf [file c2ce25873k.pdf]

## Electronic Supplementary Information

### Thin copper oxide nanowires/carbon nanotubes interpenetrating networks for lithium ion batteries

Hongwen Huang, Qing Yu, Yinghui Ye, Peng Wang, Liqiang Zhang, Mingxia Gao, Xinsheng Peng\*, Zhizhen Ye\*

State Key Laboratory of Silicon Materials, Department of Materials Science and Engineering, Zhejiang University, Hangzhou, 310027, P. R. China

Tel. & Fax: (+86) 0571-87952625;

Email: pengxinsheng@zju.edu.cn; yezz@zju.edu.cn.

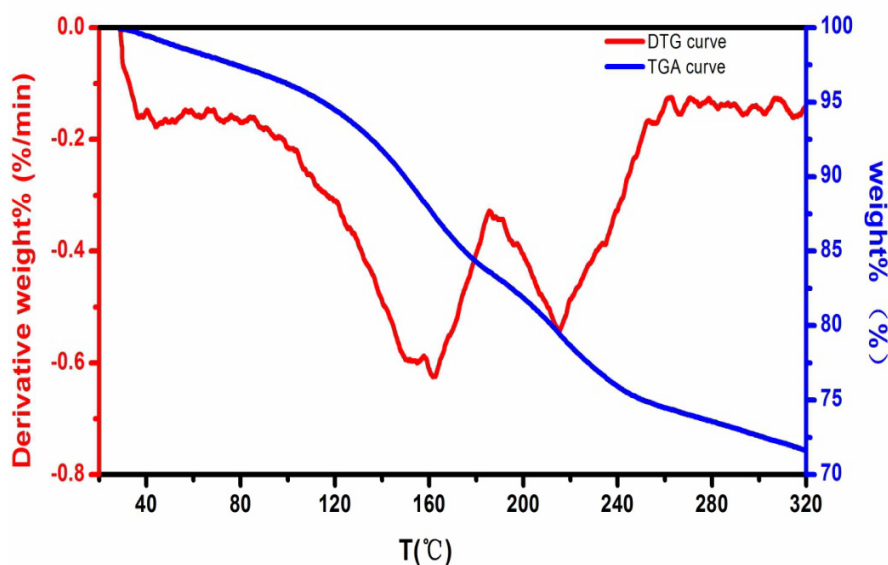

**Figure S1.** TGA and DTG curves of the ultrathin  $\text{Cu}(\text{OH})_2$  Nanowires (NWs) in air.

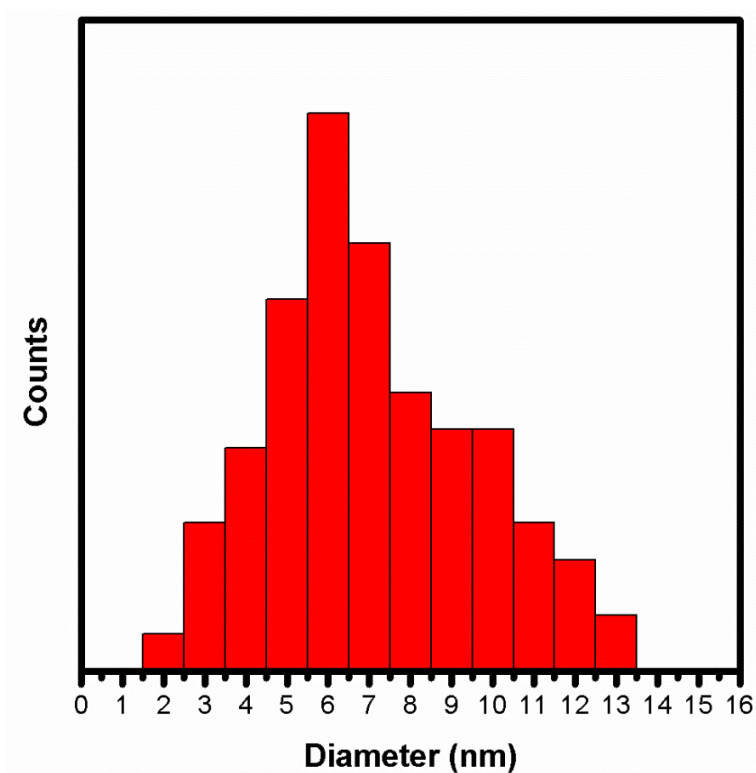

**Figure S2.** The diameter distribution histogram of the obtained CuO NWs.

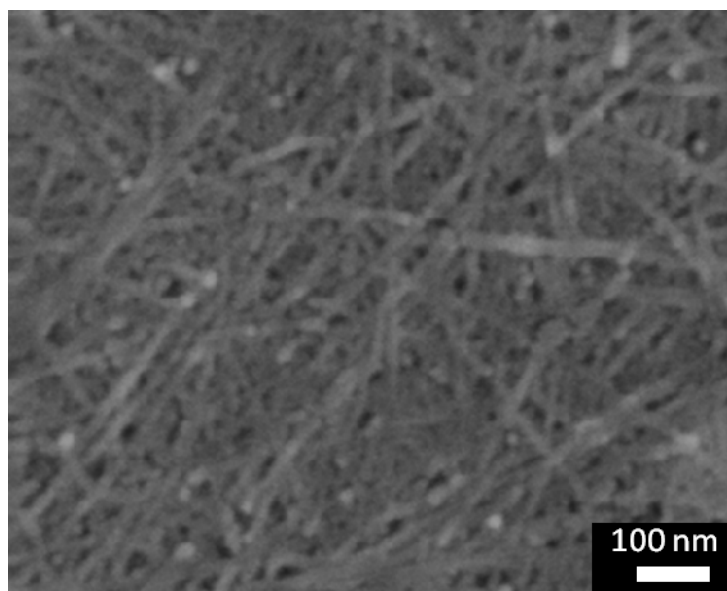

**Figure S3.** The products after heat treatment of Cu(OH)<sub>2</sub> NWs at 300 °C for 2 hours.

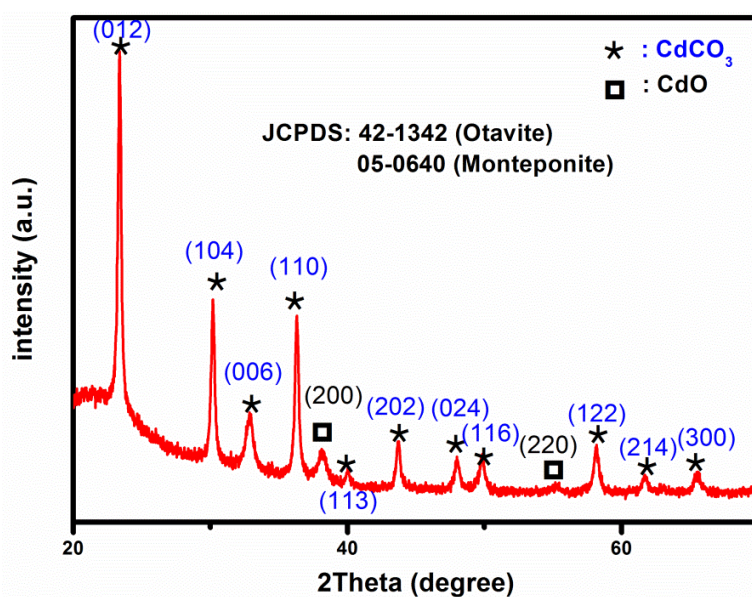

**Figure S4.** The XRD patterns of as-prepared products after thermal treatment of the thin  $\text{Cd}(\text{OH})_2$  NWs at 250 °C for 2 hours in the air.

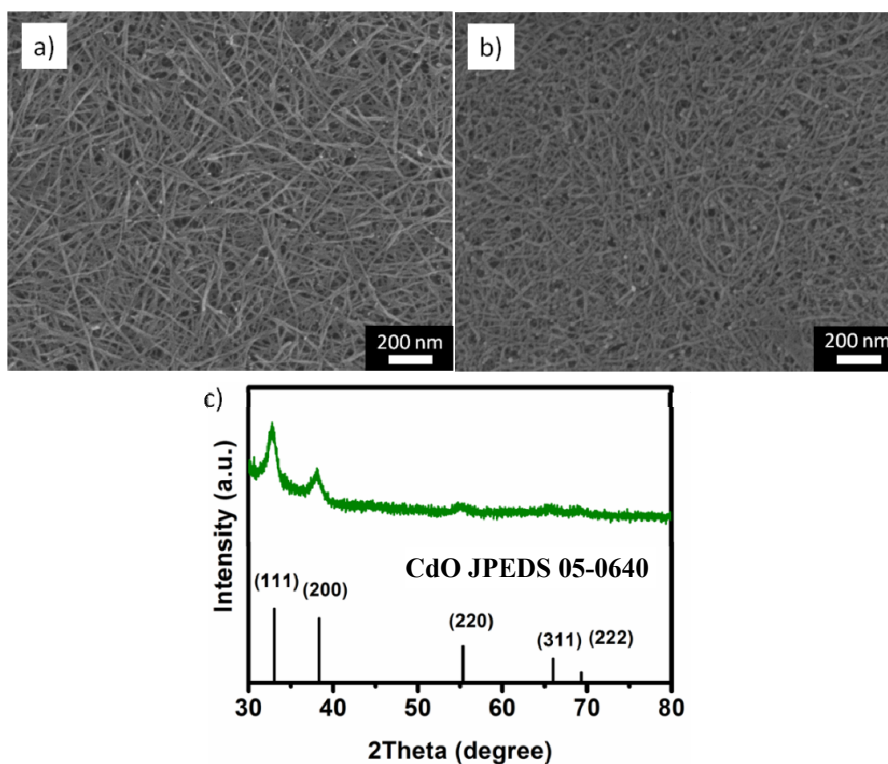

**Figure S5.** SEM images of (a) ultrathin  $\text{Cd}(\text{OH})_2$  NWs; (b) products after heat treatment of  $\text{Cd}(\text{OH})_2$  NWs at 250 °C for 2 hours with the protection of  $\text{N}_2$ ; (c) XRD patterns of the final products displayed in Figure S5b.
